# Supplementary material
Source: Springer Nature journal article supplement (https://www.springermedizin.de/resource/supplementary/12916_2009_232_MOESM2_ESM.pdf/9599448)
Supplement: MOESM2 [file 9599448]

Purposive selection of study districts with high VL incidence in 4 study sites of India , Bangladesh , Nepal 1, Nepal2

Purposive selection of 4 large study villages based on VL incidence in each site

Sub-division of villages into hamlets/ neighbourhoods with 50-100 houses each

Random selection of 6 hamlets (clusters) in each village (24 clusters per site)

Random selection of 5 households in each clusters for entomological survey (120 households per site)

Vector density measured with CDC light traps over 2 nights in each household

Random allocation of clusters with similar vector densities to intervention and control arms (6 clusters per arm per site)

6 clusters to LLINs<sup>®</sup>

6 clusters to IRS

6 clusters to EVM

6 clusters to Control

Vector density measurements with CDC light traps per night (per house) in every sample household (baseline and 5 months follow-up)
